# Supplementary material for: New generation of camptothecin derivatives spontaneously alkylating DNA
Source: Royal Society of Chemistry journal article supplement (doi:10.1039/c6nj01217e), 2016-01-01
Supplement: c6nj01217e1.pdf [file c6nj01217e1.pdf]

Supporting Information

**New generation of Top I inhibitors from camptothecin family  
spontaneously alkylating DNA**

Beata Naumczuk, Katarzyna Wiktorska, Katarzyna Lubelska, Robert Kawęcki, Wojciech Bocian, Elżbieta Bednarek, Jerzy Sitkowski, Zdzisław Chilmończyk and Lech Kozerski\*

Table 1S. The Selectivity Indexes of compounds **2a-e**.

| Cell lines | IC <sub>50</sub> , ratio, normal vs. cancer cell |           |           |           |           |           |           |
|------------|--------------------------------------------------|-----------|-----------|-----------|-----------|-----------|-----------|
|            | <b>1b</b>                                        | <b>1c</b> | <b>2a</b> | <b>2b</b> | <b>2c</b> | <b>2d</b> | <b>2e</b> |
| MDA        | 64                                               | 14.6      | 366       | 1250      | 270       | 3365      | 2700      |
| MCF7       | 7.5                                              | 6.4       | 81        | 166       | 87        | 447       | 103       |
| Caco2      | 5.2                                              | 0.38      | 44        | 30.7      | 50        | 37        | 268       |
| HT29       | 249                                              | 13.2      | 895       | 988       | 687       | 4900      | 9460      |
| HL60       | 1245                                             | 21.3      | 6710      | 16900     | 1760      | 46800     | 23000     |
| A549       | 178                                              | 3.38      | 1130      | 2860      | 981       | 3700      | 1890      |

Chemical shift changes of d(GCGATCGC)<sub>2</sub> on addition of **2**.

Octamer d(GCGATCGC)<sub>2</sub> was dissolved in 600 μL of H<sub>2</sub>O/D<sub>2</sub>O (9:1 v/v) containing K<sub>3</sub>PO<sub>4</sub> (25 mM) and NaCl (25 mM). This solution was mixed with 2 eq. of camptothecins **2** at 10°C and pH was adjusted to 6.

Table 2S. Chemical shift changes for H1' protons of d(GCGATCGC)<sub>2</sub> (1 eq.) on addition of **2** (2 eq.) in aq. phosphate buffer at pH 6, 10°C.

|    | H1'       |           |           |           |           |
|----|-----------|-----------|-----------|-----------|-----------|
|    | <b>2a</b> | <b>2b</b> | <b>2c</b> | <b>2d</b> | <b>2e</b> |
| G1 | 0,14      | 0,13      | 0,09      | 0,15      | 0,1       |
| C2 | 0,04      | 0,05      | 0,04      | 0,05      | 0,05      |
| G3 | 0,04      | 0,04      | 0,03      | 0,04      | 0,03      |
| A4 | 0,03      | 0,02      | 0,02      | 0,03      | 0,02      |
| T5 | 0,03      | 0,03      | 0,02      | 0,03      | 0,02      |
| C6 | 0,04      | 0,04      | 0,03      | 0,04      | 0,03      |
| G7 | 0,03      | 0,03      | 0,03      | 0,04      | 0,03      |
| C8 | 0,08      | 0,07      | 0,07      | 0,09      | 0,07      |

Table 3S. Chemical shift changes for H6 or H8 protons of d(GCGATCGC)<sub>2</sub> (1 eq.) on addition of **2** (2 eq.) in aq. phosphate buffer at pH 6, 10°C.

|    | H6/H8     |           |           |           |           |
|----|-----------|-----------|-----------|-----------|-----------|
|    | <b>2a</b> | <b>2b</b> | <b>2c</b> | <b>2d</b> | <b>2e</b> |
| G1 | 0,14      | 0,14      | 0,11      | 0,15      | 0,11      |
| C2 | 0,07      | 0,06      | 0,04      | 0,07      | 0,04      |
| G3 | 0,04      | 0,03      | 0,03      | 0,04      | 0,03      |
| A4 | 0,03      | 0,02      | 0,02      | 0,03      | 0,02      |
| T5 | 0,03      | 0,02      | 0,02      | 0,03      | 0,02      |
| C6 | 0,02      | 0,03      | 0,02      | 0,03      | 0,02      |
| G7 | 0,03      | 0,03      | 0,02      | 0,04      | 0,03      |
| C8 | 0,05      | 0,06      | 0,04      | 0,06      | 0,04      |

Table 4S. Chemical shift changes for H2' protons of d(GCGATCGC)<sub>2</sub> (1 eq.) on addition of **2** (2 eq.) in aq. phosphate buffer at pH 6, 10°C.

|    | H2'       |           |           |           |           |
|----|-----------|-----------|-----------|-----------|-----------|
|    | <b>2a</b> | <b>2b</b> | <b>2c</b> | <b>2d</b> | <b>2e</b> |
| G1 | 0,13      | 0,12      | 0,09      | 0,13      | 0,09      |
| C2 | 0,04      | 0,04      | 0,03      | 0,05      | 0,04      |
| G3 | 0,03      | 0,03      | 0,02      | 0,03      | 0,03      |
| A4 | 0,02      | 0,02      | 0,01      | 0,02      | 0,01      |
| T5 | 0,02      | 0,02      | 0,02      | 0,03      | 0,02      |
| C6 | 0,01      | 0,02      | 0,01      | 0,02      | 0,02      |
| G7 | 0,01      | 0,02      | 0,01      | 0,02      | 0,01      |
| C8 | -0,01     | -0,02     | -0,01     | -0,01     | -0,01     |
